# Supplementary material for: Evidence of Evolutionary Constraints That Influences the Sequence Composition and Diversity of Mitochondrial Matrix Targeting Signals
Source: PubMed Central journal article supplement (PMC3692466; doi:10.1371/journal.pone.0067938), 2013-06-25
Supplement: pone.0067938.s002.pdf [file pone.0067938.s002.pdf]

Figure S2

| Species | Accession    | MTS Length | Secondary structure of mature protein (1-100 aa)<br>(blue – alpha helix, yellow – beta strand, red – disorder prediction) |
|---------|--------------|------------|---------------------------------------------------------------------------------------------------------------------------|
| Os      | Os08g32850.1 | 18         |                                         |
|         | Os01g46070.1 | 19         |                                         |
|         | Os07g09060.1 | 22         |                                         |
|         | Os05g03480.2 | 23         |                                         |
|         | Os11g01154.1 | 24         |                                         |
|         | Os04g32330.1 | 66         |                                         |
|         | Os04g44400.1 | 83         |                                         |
|         | Os12g32986.1 | 92         |                                         |
|         | Os12g41500.1 | 92         |                                         |
|         | Os06g01630.1 | 117        |                                         |
| At      | AT1G53240.1  | 22         |                                         |
|         | AT3G61530.1  | 23         |                                         |
|         | AT1G59900.1  | 24         |                                         |
|         | AT2G35120.1  | 24         |                                         |
|         | AT3G10920.1  | 27         |                                         |
|         | AT1G51390.1  | 90         |                                       |
|         | AT2G05710.1  | 90         |                                       |
|         | AT5G52520.1  | 101        |                                       |
|         | AT3G13930.1  | 102        |                                       |
|         | AT3G59760.1  | 109        |                                       |

| Species | Accession   | MTS Length | Secondary structure of mature protein (1-100 aa)<br>(blue – alpha helix, yellow – beta strand, red – disorder prediction) |
|---------|-------------|------------|---------------------------------------------------------------------------------------------------------------------------|
| Sc      | ARGJ_YEAST  | 8          |                                                                                                                           |
|         | ETR1_YEAST  | 9          |                                                                                                                           |
|         | SYLM_YEAST  | 9          |                                                                                                                           |
|         | GLO4_YEAST  | 10         |                                                                                                                           |
|         | JAC1_YEAST  | 10         |                                                                                                                           |
|         | HEM1_YEAST  | 56         |                                                                                                                           |
|         | ARG56_YEAST | 57         |                                                                                                                           |
|         | CCPR_YEAST  | 67         |                                                                                                                           |
|         | ODO2_YEAST  | 71         |                                                                                                                           |
|         | RPM2_YEAST  | 122        |                                                                                                                           |
| Mm      | HCDH_MOUSE  | 12         |                                                                                                                           |
|         | SYNM_MOUSE  | 14         |                                                                                                                           |
|         | PREP_MOUSE  | 15         |                                                                                                                           |
|         | TMLH_MOUSE  | 15         |                                                                                                                           |
|         | SYRM_MOUSE  | 16         |                                                                                                                           |
|         | HEM1_MOUSE  | 56         |                                                                                                                           |
|         | ODB2_MOUSE  | 61         |                                                                                                                           |
|         | ADX_MOUSE   | 64         |                                                                                                                           |
|         | LONM_MOUSE  | 65         |                                                                                                                           |
|         | C1QBP_MOUSE | 70         |                                                                                                                           |
