# Supplementary material for: Evidence of Evolutionary Constraints That Influences the Sequence Composition and Diversity of Mitochondrial Matrix Targeting Signals
Source: PubMed Central journal article supplement (PMC3692466; doi:10.1371/journal.pone.0067938), 2013-06-25
Supplement: pone.0067938.s003.pdf [file pone.0067938.s003.pdf]

**Table S1: Quantitative comparison of sequence characteristics and amino acid groupings of MTS and mature protein sequences for each species used in this investigation**

| MTS                           | N  | Length  | GAVIL   | FW     | P      | CM     | ST      | Y      | NQ     | DE     | RHK     | pH7.5  |
|-------------------------------|----|---------|---------|--------|--------|--------|---------|--------|--------|--------|---------|--------|
| <i>H. sapiens</i>             | 85 | 34.51 ± | 43.35 ± | 5.50 ± | 6.45 ± | 7.12 ± | 11.72 ± | 1.22 ± | 4.47 ± | 1.38 ± | 18.79 ± | 5.12 ± |
|                               |    | 13.66   | 10.87   | 4.51   | 5.09   | 3.76   | 6.74    | 1.85   | 4.75   | 2.63   | 5.02    | 1.88   |
| <i>M. musculus</i>            | 84 | 33.08 ± | 41.66 ± | 5.67 ± | 5.28 ± | 7.83 ± | 13.71 ± | 0.89 ± | 4.34 ± | 1.34 ± | 19.29 ± | 4.97 ± |
|                               |    | 12.68   | 9.84    | 4.33   | 4.43   | 4.08   | 6.55    | 1.68   | 4.40   | 2.11   | 4.76    | 1.62   |
| <i>S. cerevisiae</i>          | 56 | 28.77 ± | 31.69 ± | 6.2 ±  | 3.05 ± | 6.91 ± | 19.73 ± | 2.87 ± | 7.63 ± | 0.71 ± | 21.21 ± | 4.94 ± |
|                               |    | 19.01   | 9.97    | 4.36   | 3.42   | 4.24   | 8.5     | 3.7    | 5.83   | 2.42   | 5.75    | 2.5    |
| <i>A. thaliana</i>            | 35 | 53.6 ±  | 34.31 ± | 6.24 ± | 3.81 ± | 6.22 ± | 22.73 ± | 1.03 ± | 5.85 ± | 2.59 ± | 17.23 ± | 5.96 ± |
|                               |    | 28.29   | 6.67    | 3.92   | 2.90   | 3.33   | 6.2     | 1.28   | 3.25   | 3.04   | 4.26    | 2.45   |
| <i>O. sativa</i>              | 36 | 46.08 ± | 45.5 ±  | 2.82 ± | 7.43 ± | 4.49 ± | 12.95 ± | 1.91 ± | 3.50 ± | 2.27 ± | 19.12 ± | 5.87 ± |
|                               |    | 28.65   | 11.02   | 3.01   | 6.47   | 2.21   | 5.29    | 2.47   | 3.29   | 2.84   | 5.73    | 2.79   |
| <b>Significant variation?</b> |    | yes     | yes     | no     | no     | no     | yes     | no     | no     | no     | no      | no     |

  

| Mature Protein                | N  | Length   | GAVIL   | FW     | P      | CM     | ST      | Y      | NQ     | DE      | RHK     | pH7.5   | pI     |
|-------------------------------|----|----------|---------|--------|--------|--------|---------|--------|--------|---------|---------|---------|--------|
| <i>H. sapiens</i>             | 85 | 399.13 ± | 38.00 ± | 4.99 ± | 4.98 ± | 4.00 ± | 11.31 ± | 2.91 ± | 7.73 ± | 12.25 ± | 13.84 ± | -1.90 ± | 6.86 ± |
|                               |    | 192.79   | 4.46    | 1.6    | 1.37   | 1.29   | 2.17    | 1.09   | 1.67   | 2.66    | 2.22    | 7.16    | 1.39   |
| <i>M. musculus</i>            | 84 | 481.4 ±  | 37.67 ± | 4.99 ± | 5.07 ± | 4.11 ± | 11.66 ± | 2.96 ± | 7.52 ± | 12.08 ± | 13.95 ± | -2.78 ± | 6.85 ± |
|                               |    | 224      | 3.4     | 1.33   | 1.43   | 1.05   | 1.76    | 0.99   | 1.4    | 2.03    | 1.8     | 7.07    | 1.16   |
| <i>S. cerevisiae</i>          | 56 | 454 ±    | 35.62 ± | 4.81 ± | 4.46 ± | 2.89 ± | 12.98 ± | 3.09 ± | 8.7 ±  | 13.33 ± | 14.11 ± | -4.21 ± | 6.71 ± |
|                               |    | 251.46   | 4.73    | 1.45   | 1.17   | 1.26   | 2.09    | 1.17   | 2.36   | 2.86    | 2.74    | 9.36    | 1.51   |
| <i>A. thaliana</i>            | 35 | 398.97 ± | 39.67 ± | 4.09 ± | 4.92 ± | 3.67 ± | 12.9 ±  | 2.87 ± | 6.61 ± | 12.55 ± | 12.71 ± | -6.79 ± | 5.93 ± |
|                               |    | 204.93   | 3.73    | 1.54   | 1.72   | 1.32   | 1.71    | 0.99   | 1.69   | 2.04    | 2.07    | 6.12    | 0.78   |
| <i>O. sativa</i>              | 36 | 427.19 ± | 40.59 ± | 4.3 ±  | 5.01 ± | 3.88 ± | 11.89 ± | 2.75 ± | 6.54 ± | 12.22 ± | 12.82 ± | -7.14 ± | 6.06 ± |
|                               |    | 201.14   | 4.09    | 1.18   | 1.71   | 1.39   | 2.42    | 0.93   | 1.29   | 1.85    | 1.55    | 7.25    | 0.93   |
| <b>Significant variation?</b> |    | yes      | no      | no     | no     | no     | no      | no     | no     | no      | no      | no      | no     |

<sup>1</sup> Data is presented and the mean ± standard deviation

<sup>2</sup> Significant variation was determined using a two-way ANOVA
